# Supplementary material for: Genome-Wide Mining of Selaginella moellendorffii for Hevein-like Lectins and Their Potential Molecular Mimicry with SARS-CoV-2 Spike Glycoprotein
Source: MDPI journal article supplement (doi:10.3390/cimb45070372), 2023-07-14
Supplement: s1 [file s1]

# Genome-wide mining for Hevein-like lectins from *Selaginella moellendorffii* and their potential molecular mimicry with SARS-CoV2 spike glycoprotein

## Supplementary File S1

### Tables

Table S1: trRosetta templates used for lectin homology modeling

| ID        | Template | Confidence | Coverage | Identity | E-value | Z-score |
|-----------|----------|------------|----------|----------|---------|---------|
| Smo446851 | 2DKV_A   | 100.0      | 89.9     | 62.9     | 2.9E-34 | 63.357  |
|           | 6LNR_A   | 100.0      | 88.3     | 54.1     | 8.5E-36 | 65.895  |
|           | 3W3E_A   | 99.9       | 75.6     | 64.0     | 1.3E-21 | 42.420  |
|           | 4TX7_A   | 99.8       | 77.2     | 62.9     | 2.6E-20 | 40.244  |
|           | 1DXJ_A   | 99.9       | 75.9     | 62.0     | 1.7E-22 | 43.870  |
| Smo443112 | 2DKV_A   | 100.0      | 88.8     | 63.6     | 9.2E-35 | 63.931  |
|           | 6LNR_A   | 100.0      | 88.4     | 54.5     | 2.2E-35 | 63.921  |
|           | 3W3E_A   | 99.9       | 74.7     | 64.5     | 7.2E-22 | 42.712  |
|           | 4TX7_A   | 99.8       | 76.2     | 62.9     | 1.5E-20 | 40.581  |
|           | 1DXJ_A   | 99.9       | 75.0     | 62.4     | 1.6E-22 | 43.822  |
| Smo437354 | 3D30_A   | 99.8       | 62.5     | 25.0     | 2.3E-19 | 33.403  |
|           | 1N10_A   | 99.7       | 71.0     | 23.0     | 9.3E-19 | 32.541  |
|           | 2HCZ_X   | 99.7       | 71.5     | 28.5     | 9.5E-19 | 32.514  |
|           | 4JS7_A   | 99.7       | 60.5     | 18.0     | 1.4E-18 | 32.253  |
|           | 4JJO_A   | 99.7       | 60.5     | 21.0     | 2.7E-18 | 31.887  |

Z-score: Normalized score of the raw alignment. Z-score > 11 indicates a reliable hit, E-value: values closer to 0 indicate a more significant hit.

Table S2: Predicted TM-score for each lectin model.

| ID        | TM-score | ID         | TM-score |
|-----------|----------|------------|----------|
| Smo446851 | 0.879    | Smo443112  | 0.858    |
| Smo35272  | 0.467    | Smo7_99416 | 0.590    |
| Smo125663 | 0.520    | Smo437354  | 0.740    |
| Smo425957 | 0.443    | Smo99732   | 0.722    |
| Smo403798 | 0.513    | Smo139127  | 0.689    |

Table S3: The binding site residues of the lectins

| Lectin    | Hevein domain                | Active residues in the binding site                               |
|-----------|------------------------------|-------------------------------------------------------------------|
| Smo446851 | 22-58                        | S38, W40, G41, W42, G44, D48, H49                                 |
| Smo35272  | 1-38, 39-76, 77-113, 120-154 | S93, F95, G96, Y97, G99, F104, S136, F138, G139, Y140, G142, Y147 |
| Smo125663 | 19-49, 57-91                 | S73, F75, G76, Y77, G79, Y84                                      |
| Smo425957 | 38-68                        | S54, F56, G57, Y58, G60, Y65                                      |
| Smo403798 | 38-72                        | S54, F56, G57, Y58, G60, A64, F65                                 |
| Smo443112 | 22-58                        | S38, W40, G41, W42, G44, D48, H49                                 |
| Smo99416  | 23-59, 44-99                 | S39, Y41, G42, Y43, G45, Y50                                      |
| Smo437354 | 26-57                        | S37, W39, G40, Y41, G43, Y48                                      |
| Smo99732  | 30-62                        | S41, F43, G44, Y45, G47, Y52                                      |
| Smo139127 | 19-53                        | S35, F37, G38, Y39, G41, Y46                                      |

Table S4: The hydrogen bonds formed in protein-protein interactions of mutant S protein RBD and lectins.

| Mutant | Lectin    | # of H-bonds | Interacting residues                                   |                                                  | Docking score● | Confidence score* | MM/GBSA ● |
|--------|-----------|--------------|--------------------------------------------------------|--------------------------------------------------|----------------|-------------------|-----------|
|        |           |              | S protein                                              | Lectins                                          |                |                   |           |
| K417N  | Smo446851 | 5            | Leu335, Lys444, Asn450, Arg466                         | Gln316, Ser108, Glu112, Gln166                   | -182.71        | 0.66              | -11.11    |
|        | Smo125663 | 8            | Thr345, Ser349, Tyr351, Arg355, Tyr449, Leu452, Arg466 | Arg74, Glu,83, Thr81, Gln36, Ser82, Glu83, Ser44 | -179.18        | 0.64              | -11.70    |
|        | Smo99732  | 5            | Ser349, Asn354, Asp467, Ser469                         | Tyr45, Asp25, Tyr52, Thr48                       | -193.45        | 0.70              | -32.78    |
| L452R  | Smo446851 | 4            | Thr333, Thr345                                         | Gly244, Glu112, Lys239                           | -177.70        | 0.64              | -14.48    |
|        | Smo125663 | 2            | Thr345, Phe347                                         | Gln22, Arg59                                     | -177.76        | 0.64              | -06.97    |
|        | Smo99732  | 2            | Arg453, Glu516                                         | Gln61, Thr5                                      | -186.23        | 0.67              | -31.41    |
| T478K  | Smo446851 | 1            | Leu582                                                 | Pro33                                            | -197.06        | 0.72              | -9.54     |
|        | Smo125663 | 7            | Thr345, Trp353, Arg355, Arg454, Arg466, Thr470         | Arg27, Asn67, Ser42, Gly50, Tyr84                | -206.57        | 0.76              | -19.55    |
|        | Smo99732  | 5            | Ser349, Asp467, Ile468, Ser469                         | Tyr45, Tyr52, Thr48                              | -195.79        | 0.71              | -34.52    |
| E484K  | Smo446851 | 6            | Asn540, Asn542, Asp745, Glu748, Asp843                 | Arg4, Gln165                                     | -201.87        | 0.74              | -29.16    |
|        | Smo125663 | 5            | Thr354, Arg454, Arg466, Thr470                         | Arg27, Ser42, Gly50, Tyr84                       | -201.53        | 0.74              | -16.47    |
|        | Smo99732  | 1            | Tyr449                                                 | Lys2                                             | -164.55        | 0.57              | -8.93     |
| E501Y  | Smo446851 | 0            | —                                                      | —                                                | -166.31        | 0.58              | 9.94      |
|        | Smo125663 | 2            | Ser359, Asn450                                         | Glu9, Arg74                                      | -207.24        | 0.76              | -10.63    |
|        | Smo99732  | 3            | Asn354, Arg357, Asn360, Lys444                         | Lys20, Ser6                                      | -205.90        | 0.75              | -28.79    |

●Docking score and the free binding energy MM/GBSA are in Kcal/mol

\*Confidence score > 0.7, the two molecules would be very likely to bind; between 0.5 and 0.7, the two molecules would be possible to bind; < 0.5, the two molecules would be unlikely to bind.

## Figures

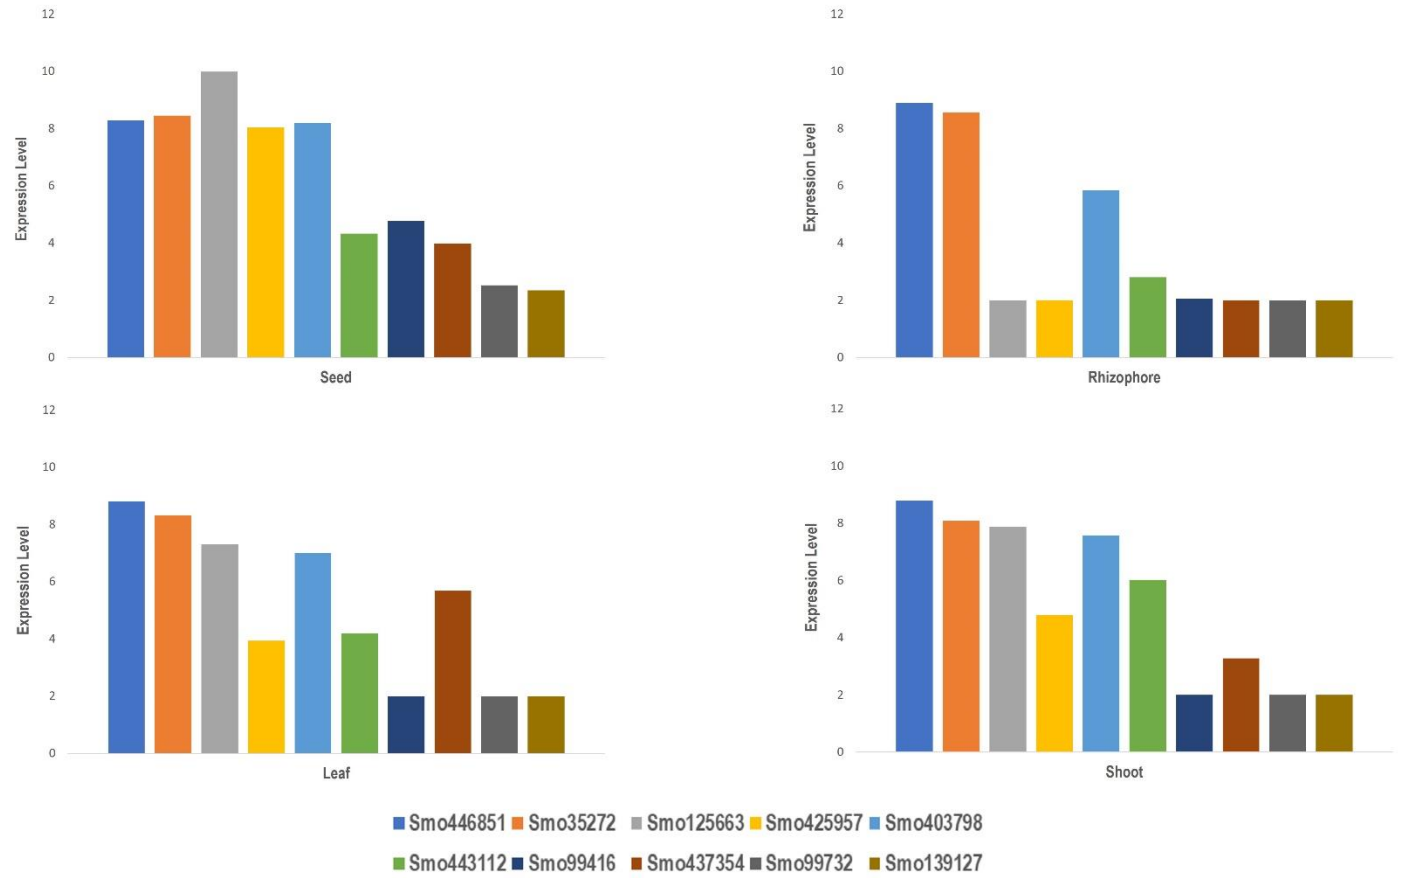

Figure S1: Expression profile of Hevein-like genes from *Selaginella moellendorffii* in different tissues/organs.

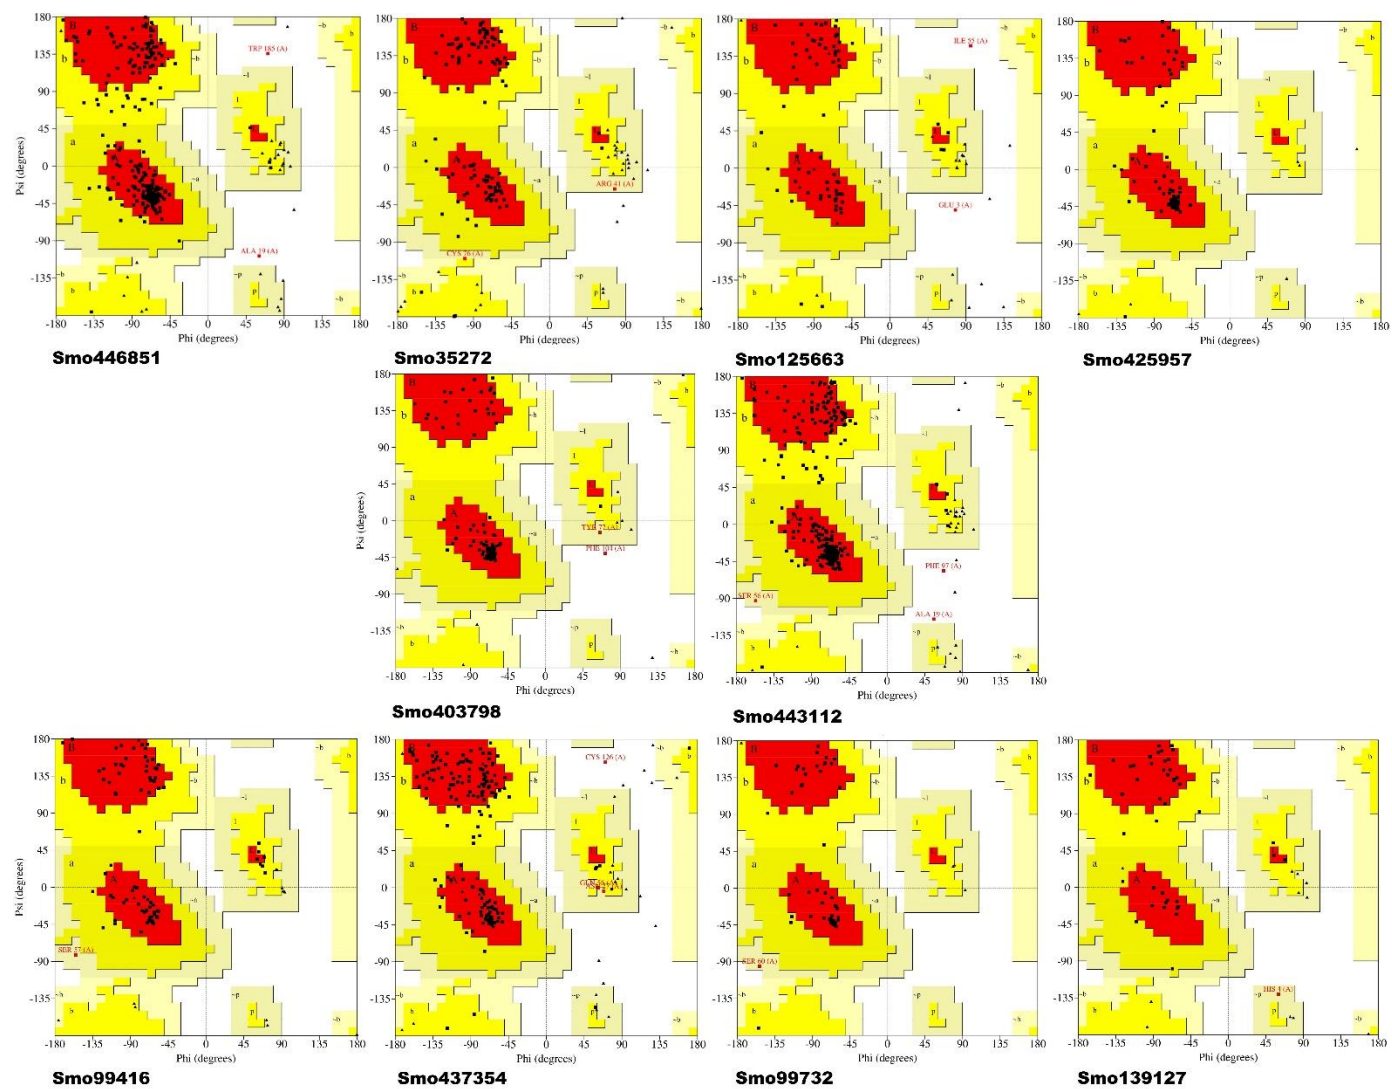

Figure S2: The Ramachandran plots for the Hevein-like lectin model structures.

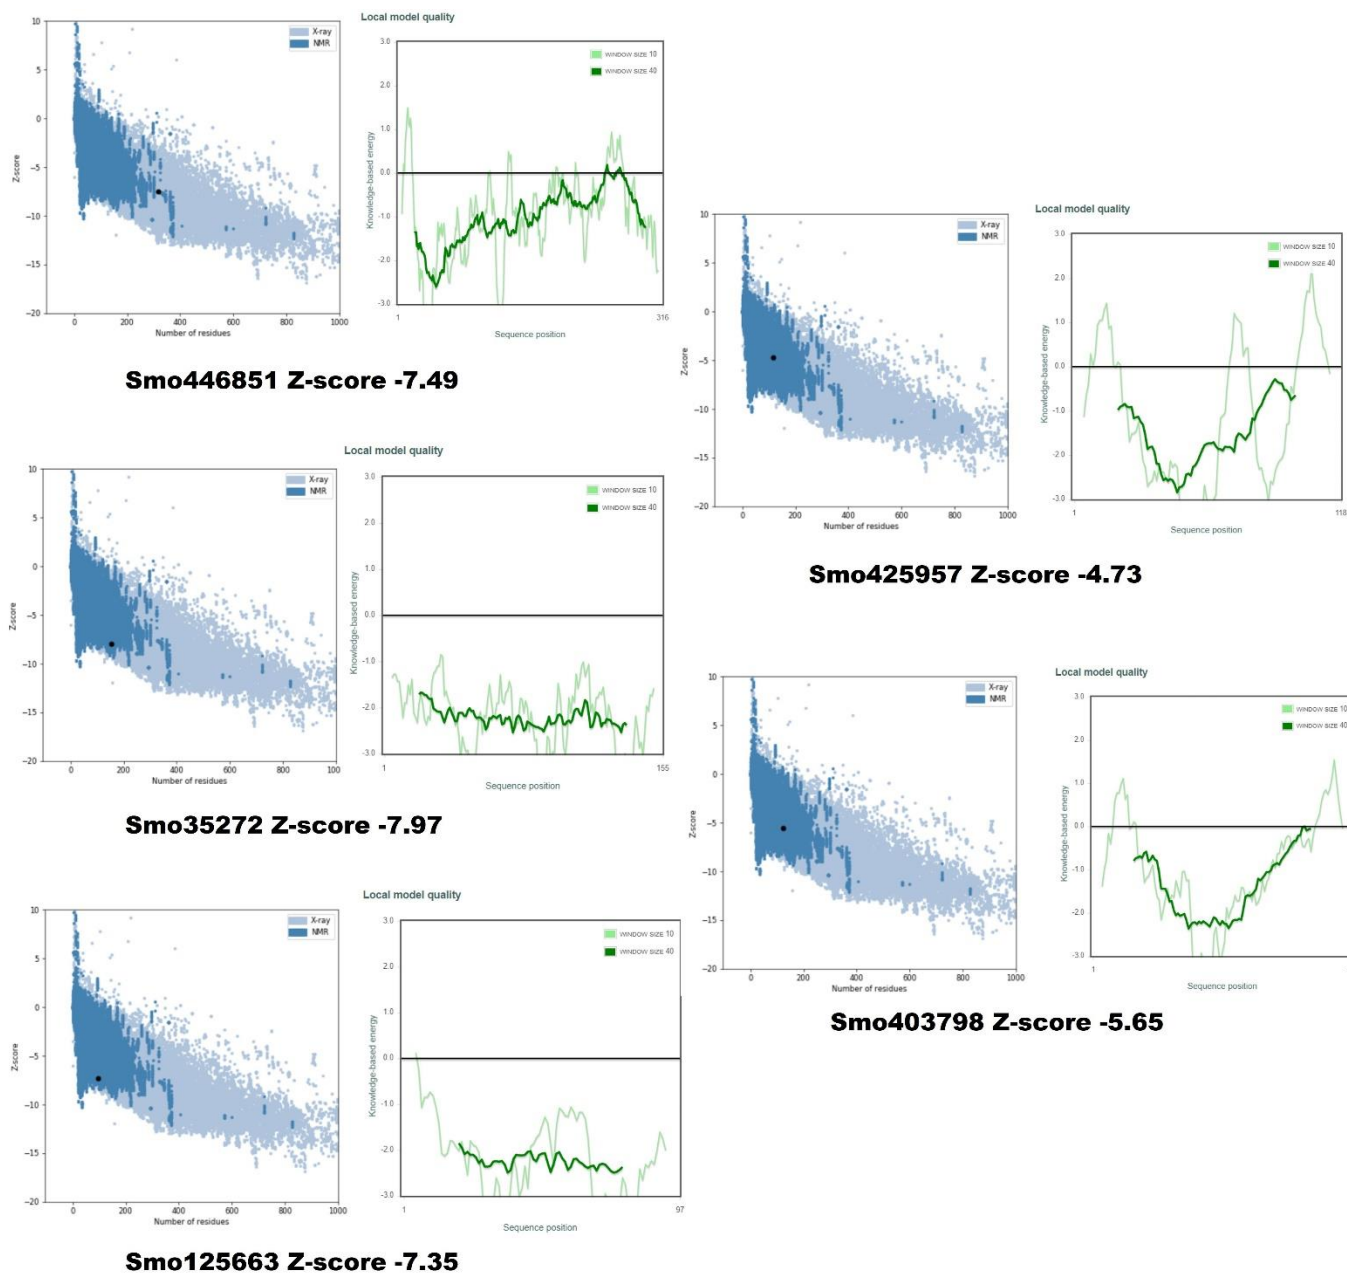

Figure S3-A: The quality and Z-score of the Hevein-like lectin structural models (five models).

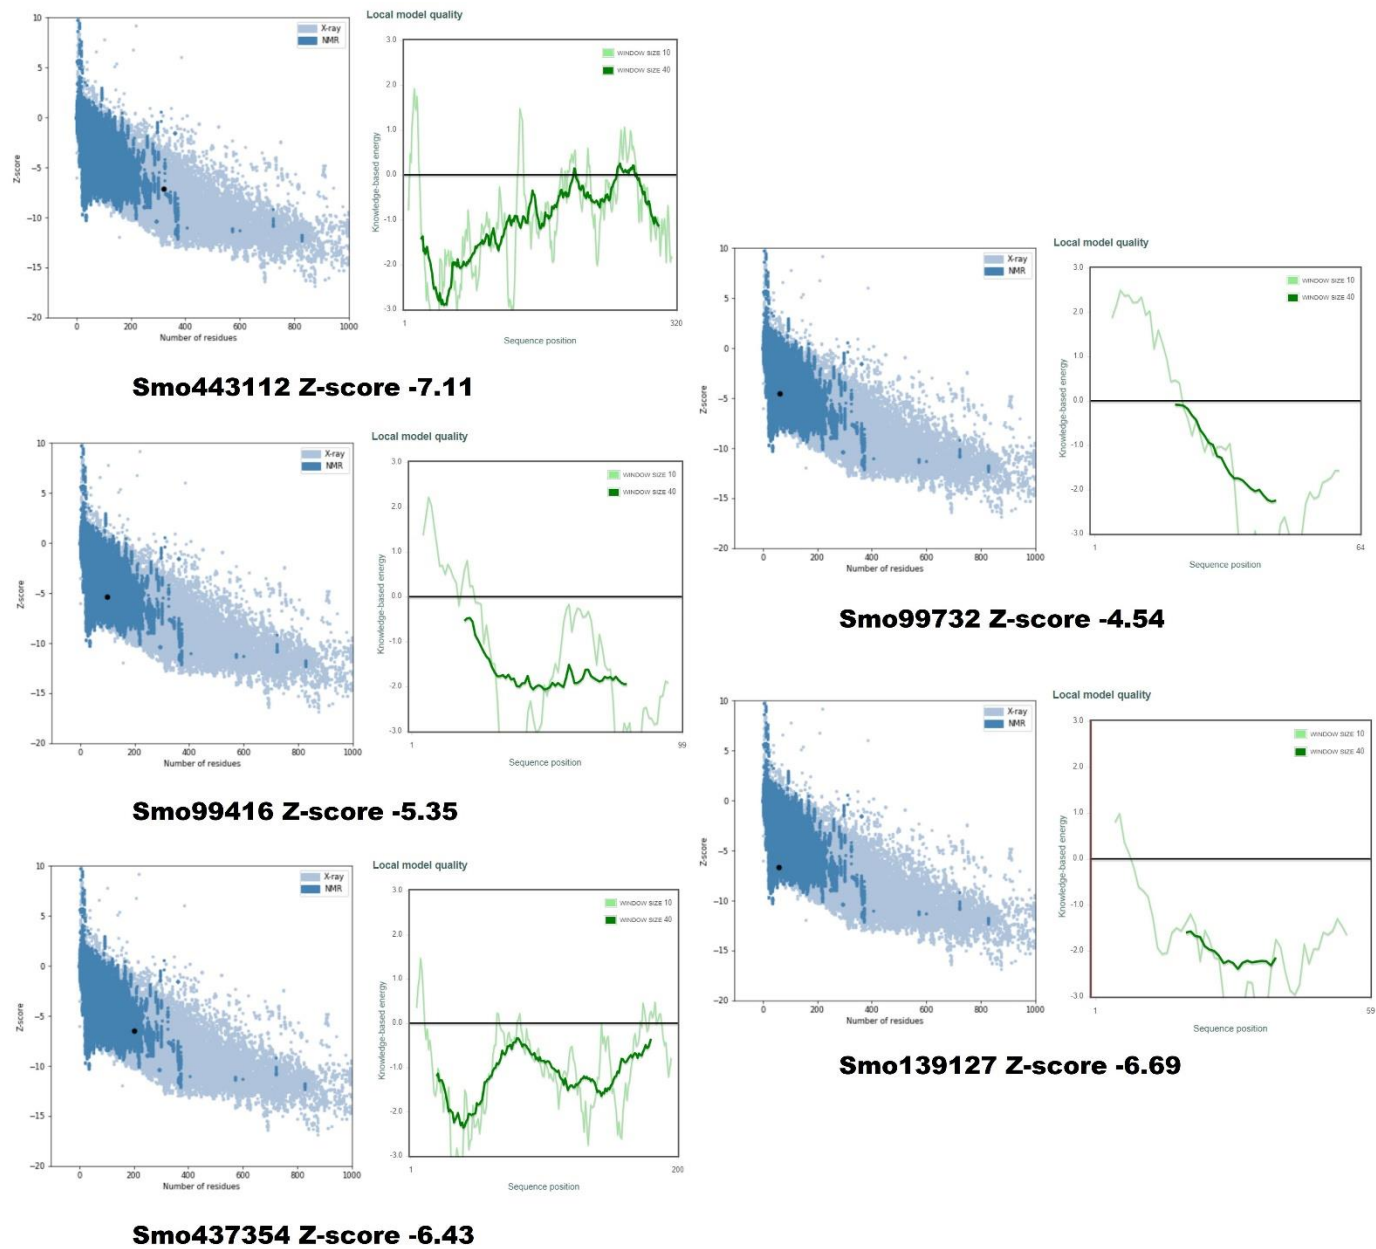

Figure S3-B: The quality and Z-score of the Hevein-like lectin structural models (five models).

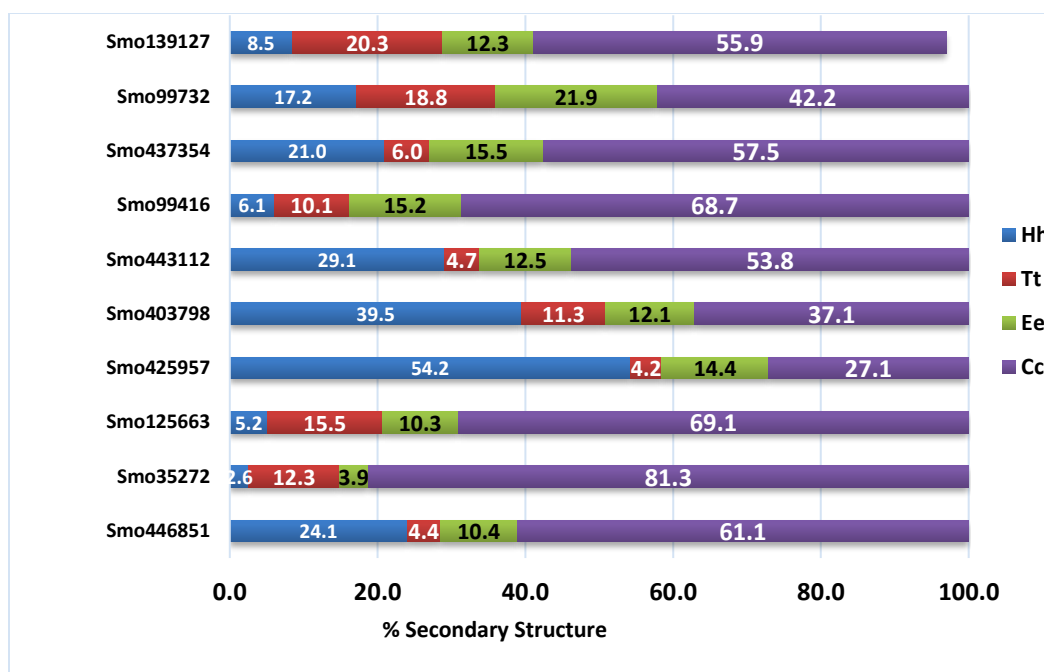

Figure S4: Prediction of the secondary structure of Hevein-like lectins from *Selaginella moellendorffii*. Hh:  $\alpha$ -helices, Tt:  $\beta$ -turns, Cc: Random Coil, Ec: Extended strand.

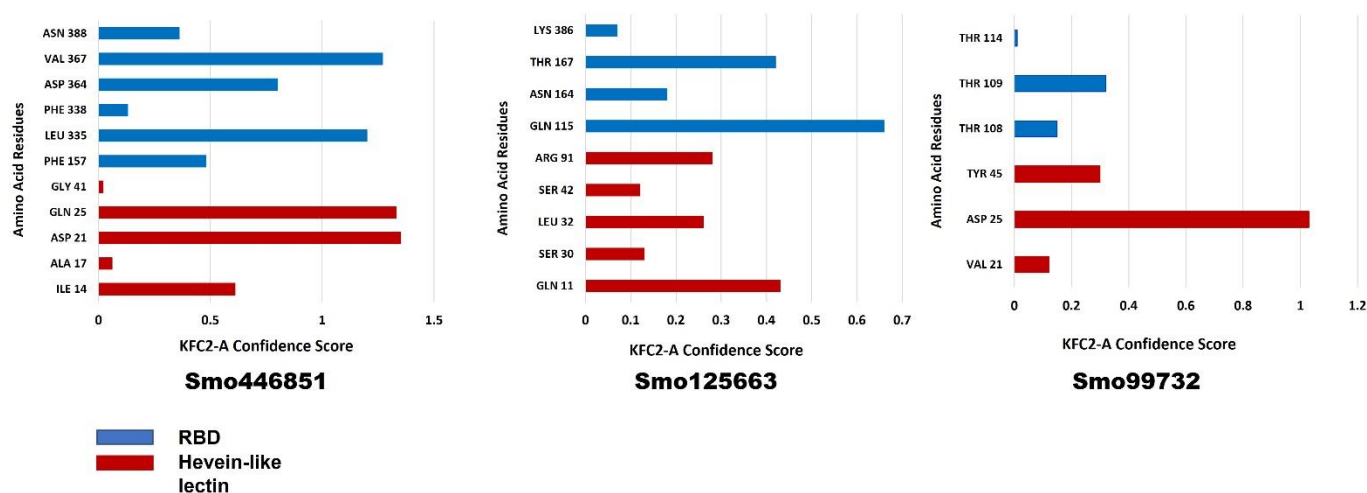

Figure S5: Hot-spot residue scores predicted by KFC-2 for the PPI involving SARS-CoV-2 S glycoprotein.



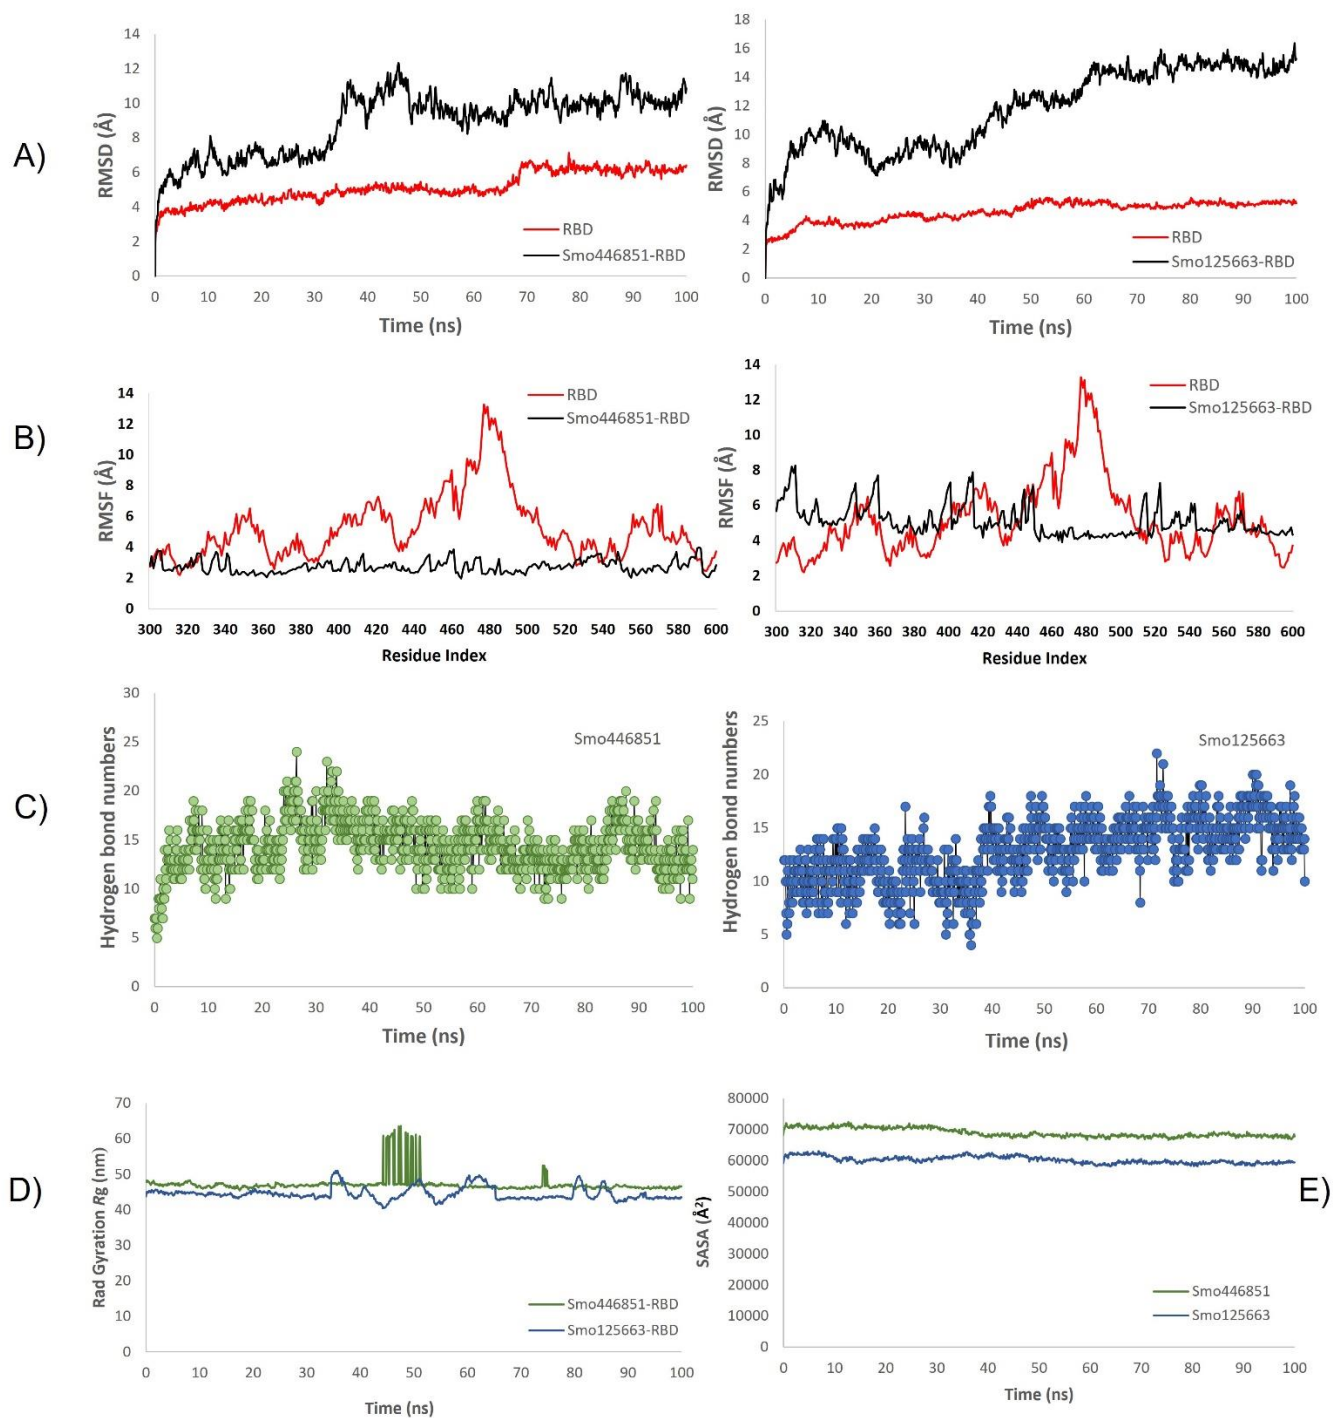

Figure S6: Molecular dynamic simulation (MDS) for the spike protein's RBD complexed with Smo446851 and Smo125663. A) RMSD, B) RMSF, C) Number of hydrogen bonds, D) Radius gyration, E) SASA.

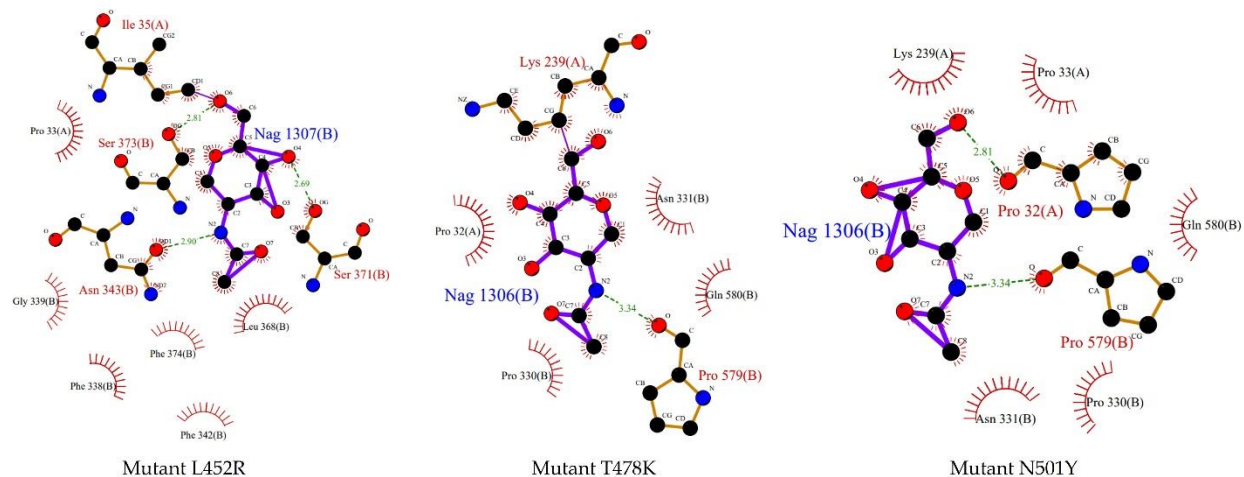

Figure S7: NAG1306 and NAG1307 of mutant spike proteins interactions with Smo446851 Hevein domain active residues
